# Supplementary material for: Short Double-Stranded DNA (≤40-bp) Affects Repair Pathway Choice
Source: MDPI journal article supplement (doi:10.3390/ijms241411836), 2023-07-23
Supplement: s1 [file s1]

## Supplementary Materials

Including Supplemental Figures S1-S4 and Supplemental Tables S1, S2

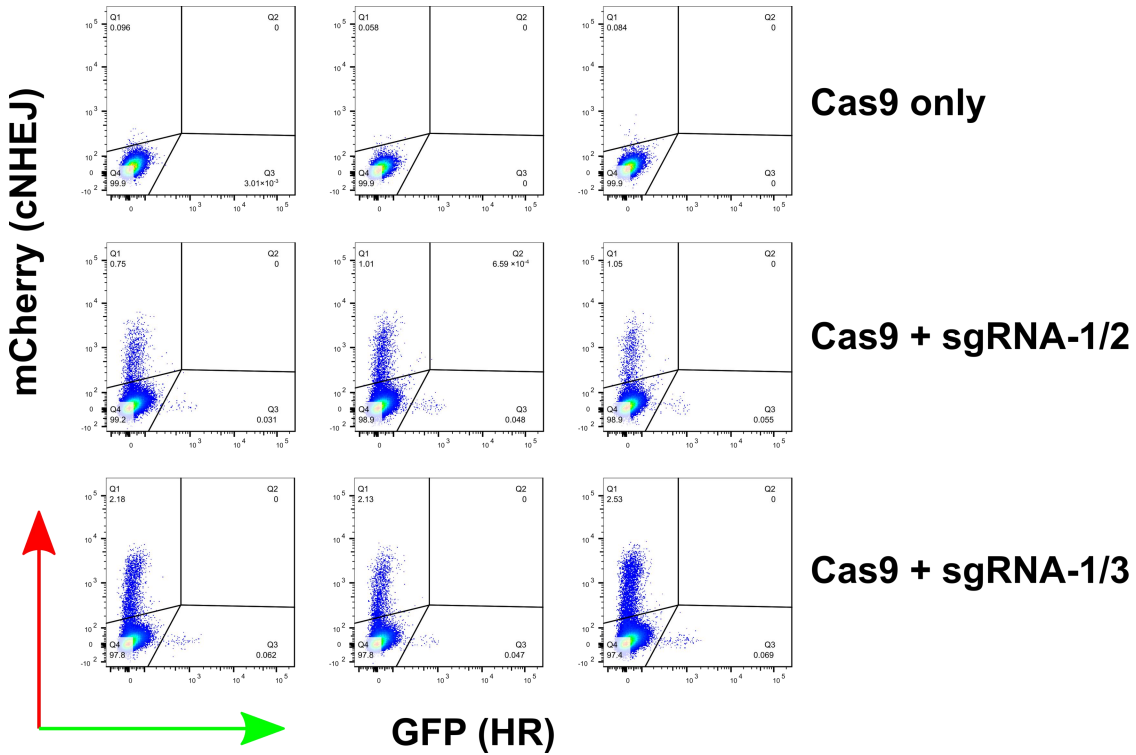

**Supplemental Figure S1.** Flow cytometry images from Cas9 with or without combined sgRNAs transduced HEK293T-1 cells. Cas9 with combined sgRNAs (1/2 or 1/3) transduced cells generated two-cuts DSBs: sgRNA-1/2 generated 30-bp DSBs; sgRNA-1/3 generated 60-bp DSBs. The mCherry signals in Q1 area represented cNHEJ products. The GFP signals in Q3 area represented HR products. Any signals in Q2 area should represent both mCherry and GFP positive ones that did not exist in this study. The dots accumulated in Q4 area represented those sorted cells without mCherry or GFP signals.

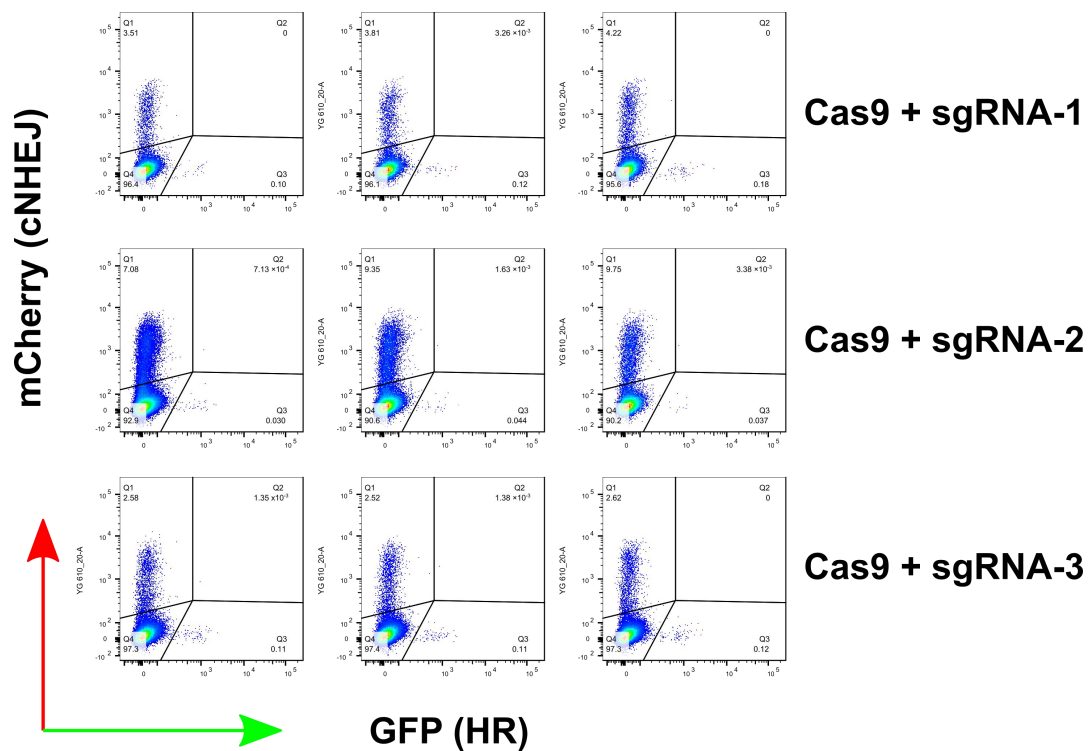

**Supplemental Figure S2.** Flow cytometry images from Cas9 with individual sgRNA transduced HEK293T-1 cells. Cas9 with individual sgRNA transduced cells generated one-cut DSBs. The mCherry signals in Q1 area represented cNHEJ products. The GFP signals in Q3 area represented HR products. The dots accumulated in Q4 area represent those sorted cells without any mCherry or GFP signals.

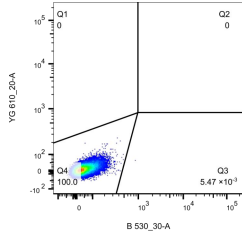

**Cas9 only**

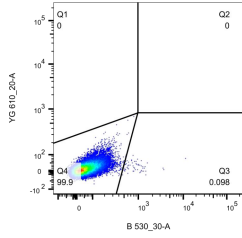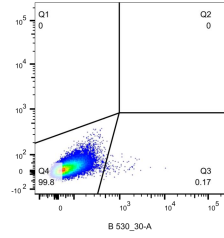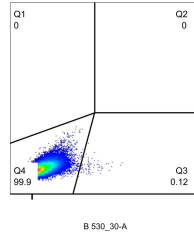

**Cas9 + sgRNA-1/2**

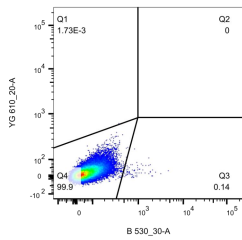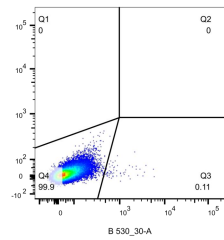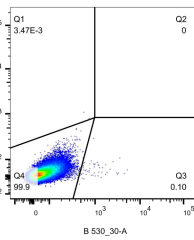

**Cas9 + sgRNA-1/3**

**GFP (aEJ)**

**Supplemental Figure S3.** Flow cytometry images from Cas9 with or without combined sgRNAs transduced HEK293T-2 cells. Cas9 with combined sgRNAs transduced cells generated two-cuts DSBs: sgRNA-1/2 generated 30-bp DSBs; sgRNA-1/3 generated 60-bp DSBs. The GFP signals in Q3 area represented aEJ products. The dots accumulated in Q4 area represent those sorted cells without GFP signals.

**Supplemental Table S1.** Analyzing flow cytometry data from HEK293T-1 cells transduced with Cas9/sgRNAs

|                   | P1   Freq. of Parent | P1/Q1: B 530_30-A- , YG 610_20-A+   Freq. of Parent | P1/Q2: B 530_30-A+ , YG 610_20-A+   Freq. of Parent | P1/Q3: B 530_30-A+ , YG 610_20-A-   Freq. of Parent | P1/Q4: B 530_30-A- , YG 610_20-A-   Freq. of Parent |
|-------------------|----------------------|-----------------------------------------------------|-----------------------------------------------------|-----------------------------------------------------|-----------------------------------------------------|
| px330_001.fcs     | 45.5 %               | 0.10%                                               | 0 %                                                 | 3.01x10 <sup>-3</sup> %                             | 99.9 %                                              |
| px330_002.fcs     | 46.3 %               | 0.06%                                               | 0 %                                                 | 0%                                                  | 99.9 %                                              |
| px330_003.fcs     | 45.8 %               | 0.08%                                               | 0 %                                                 | 0%                                                  | 99.9 %                                              |
| sg1_001.fcs       | 43.4 %               | 3.51%                                               | 0 %                                                 | 0.10%                                               | 96.4 %                                              |
| sg1_002.fcs       | 45.1 %               | 3.81%                                               | 3.26x10 <sup>-3</sup> %                             | 0.12%                                               | 96.1 %                                              |
| sg1_003.fcs       | 46.9 %               | 4.22%                                               | 0 %                                                 | 0.18%                                               | 95.6 %                                              |
| sg2_001.fcs       | 37.1 %               | 9.75%                                               | 3.38x10 <sup>-3</sup> %                             | 0.04%                                               | 90.2 %                                              |
| sg2_002.fcs       | 43.7 %               | 7.08%                                               | 7.13x10 <sup>-4</sup> %                             | 0.03%                                               | 92.9 %                                              |
| sg2_003.fcs       | 38.5 %               | 9.35%                                               | 1.63x10 <sup>-3</sup> %                             | 0.04%                                               | 90.6 %                                              |
| sg3_001.fcs       | 39.0 %               | 2.58%                                               | 1.35x10 <sup>-3</sup> %                             | 0.11%                                               | 97.3 %                                              |
| sg3_002.fcs       | 42.0 %               | 2.52%                                               | 1.38x10 <sup>-3</sup> %                             | 0.11%                                               | 97.4 %                                              |
| sg3_003.fcs       | 39.6 %               | 2.62%                                               | 0 %                                                 | 0.12%                                               | 97.3 %                                              |
| sg12_001.fcs      | 35.0 %               | 1.05%                                               | 0 %                                                 | 0.06%                                               | 98.9 %                                              |
| sg12_002.fcs      | 39.0 %               | 0.75%                                               | 0 %                                                 | 0.03%                                               | 99.2 %                                              |
| sg12_003.fcs      | 35.9 %               | 1.01%                                               | 6.59x10 <sup>-4</sup> %                             | 0.05%                                               | 98.9 %                                              |
| sg13_001.fcs      | 39.4 %               | 2.18%                                               | 0 %                                                 | 0.06%                                               | 97.8 %                                              |
| sg13_002.fcs      | 29.1 %               | 2.13%                                               | 0 %                                                 | 0.05%                                               | 97.8 %                                              |
| sg13_003.fcs      | 39.4 %               | 2.53%                                               | 0 %                                                 | 0.07%                                               | 97.4 %                                              |
|                   | cNHEJ                | SD                                                  | HR                                                  | SD                                                  |                                                     |
| vector            | 0.1%                 | 0.0002                                              | 0.00%                                               | 0.000000                                            |                                                     |
| SgRNA-1+2 (30 bp) | 0.9%                 | 0.0016                                              | 0.05%                                               | 0.000127                                            |                                                     |
| SgRNA-1+3 (60 bp) | 2.3%                 | 0.0022                                              | 0.06%                                               | 0.000112                                            |                                                     |
| sgRNA-1           | 3.8%                 | 0.0036                                              | 0.13%                                               | 0.000416                                            |                                                     |
| sgRNA-2           | 8.7%                 | 0.0144                                              | 0.04%                                               | 0.000056                                            |                                                     |
| sgRNA-3           | 2.6%                 | 0.0005                                              | 0.11%                                               | 0.000058                                            |                                                     |

**Supplemental Table S2.** Analyzing flow cytometry data from HEK293T-2 cells transduced with Cas9/sgRNAs

|               | P1   Freq. of Parent    | P1/Q1: B 530_30-A- , YG 610_20-A+   Freq. of Parent | P1/Q2: B 530_30-A+ , YG 610_20-A+   Freq. of Parent | P1/Q3: B 530_30-A+ , YG 610_20-A-   Freq. of Parent | P1/Q4: B 530_30-A- , YG 610_20-A-   Freq. of Parent |
|---------------|-------------------------|-----------------------------------------------------|-----------------------------------------------------|-----------------------------------------------------|-----------------------------------------------------|
| sg1_001.fcs   | 33.90%                  | 0 %                                                 | 0 %                                                 | 0.17%                                               | 99.8 %                                              |
| sg1_002.fcs   | 34.60%                  | 0 %                                                 | 0 %                                                 | 0.12%                                               | 99.9 %                                              |
| sg1_003.fcs   | 29.80%                  | 0 %                                                 | 0 %                                                 | 0.17%                                               | 99.8 %                                              |
| sg2_001.fcs   | 29.50%                  | 0 %                                                 | 0 %                                                 | 0.05%                                               | 99.9 %                                              |
| sg2_002.fcs   | 28.90%                  | 1.69x10 <sup>-3</sup> %                             | 0 %                                                 | 0.07%                                               | 99.9 %                                              |
| sg2_003.fcs   | 30.0 %                  | 0 %                                                 | 0 %                                                 | 0.07%                                               | 99.9 %                                              |
| sg3_001.fcs   | 32.9 %                  | 0 %                                                 | 0 %                                                 | 0.11%                                               | 99.9 %                                              |
| sg3_002.fcs   | 34.0 %                  | 0 %                                                 | 0 %                                                 | 0.11%                                               | 99.9 %                                              |
| sg3_003.fcs   | 30.7 %                  | 0 %                                                 | 0 %                                                 | 0.16%                                               | 99.8 %                                              |
| sg12_001.fcs  | 31.3 %                  | 0 %                                                 | 0 %                                                 | 0.10%                                               | 99.9 %                                              |
| sg12_002.fcs  | 29.6 %                  | 0 %                                                 | 0 %                                                 | 0.17%                                               | 99.8 %                                              |
| sg12_003.fcs  | 29.4 %                  | 0 %                                                 | 0 %                                                 | 0.12%                                               | 99.9 %                                              |
| sg13_001.fcs  | 31.7 %                  | 1.73x10 <sup>-3</sup> %                             | 0 %                                                 | 0.14%                                               | 99.9 %                                              |
| sg13_002.fcs  | 32.5 %                  | 0 %                                                 | 0 %                                                 | 0.11%                                               | 99.9 %                                              |
| sg13_003.fcs  | 27.4 %                  | 3.47x10 <sup>-3</sup> %                             | 0 %                                                 | 0.10%                                               | 99.9 %                                              |
| sfEJ2-3.fcs   | 37.9 %                  | 0 %                                                 | 0 %                                                 | 5.47x10 <sup>-3</sup> %                             | 100.0 %                                             |
|               | aEJ                     | SD                                                  |                                                     |                                                     |                                                     |
| vector        | 5.47x10 <sup>-3</sup> % |                                                     |                                                     |                                                     |                                                     |
| sg1           | 0.15%                   | 0.000289                                            |                                                     |                                                     |                                                     |
| sg2           | 0.06%                   | 0.000096                                            |                                                     |                                                     |                                                     |
| sg3           | 0.13%                   | 0.000289                                            |                                                     |                                                     |                                                     |
| Sg1+2 (30 bp) | 0.13%                   | 0.000369                                            |                                                     |                                                     |                                                     |
| Sg1+3 (60 bp) | 0.12%                   | 0.000208                                            |                                                     |                                                     |                                                     |
